# Supplementary material for: Seasonal changes characterise the shark and ray assemblages in a subtropical shallow sandy habitat in the iSimangaliso Wetland Park, South Africa
Source: PeerJ. 2023 Jul 14;11:e15636. doi: 10.7717/peerj.15636 (PMC10351505; doi:10.7717/peerj.15636)
Supplement: Supplemental Information 1 — Deployment details (including measurements of environmental variables), and the species MaxN associated with each sampling site, during winter and summer seasons. [file peerj-11-15636-s001.xlsx]

## Sheet: Deployment details_winter 2021
Site number	Date	Location	Management	Broad management	Time in (hour:min)	Depth (m)	Depth zone	SST (°C)	SBT (°C)	Current strength (km/h)	Underwater visibility (cm)
B01	2021-07-02	Central area (Area 2)	iSimangaliso Offshore Controlled Pelagic Linefish Zone North	Controlled	10:43:00	16.5	Shallow	23.4	23	N/A	219.322
B02	2021-07-02	Central area (Area 2)	iSimangaliso Offshore Controlled Pelagic Linefish Zone North	Controlled	10:57:00	23.3	Mid-depth	23.4	N/A	N/A	1143.42
B03	2021-07-02	Central area (Area 2)	iSimangaliso Offshore Controlled Pelagic Linefish Zone North	Controlled	11:09:00	31.4	Deep	23.5	22.5	N/A	463.436
B04	2021-07-07	Central area (Area 2)	iSimangaliso Offshore Controlled Pelagic Linefish Zone North	Controlled	10:41:00	15.9	Shallow	23.3	22.5	N/A	735.425
B05	2021-07-10	Central area (Area 2)	iSimangaliso Offshore Controlled Pelagic Linefish Zone North	Controlled	10:13:00	16.6	Shallow	22.7	22	0.36	1644.48
B06	2021-07-10	Central area (Area 2)	iSimangaliso Offshore Controlled Pelagic Linefish Zone North	Controlled	10:20:00	22.9	Mid-depth	22.7	21.75	0.28	726.873
B07	2021-07-10	Central area (Area 2)	iSimangaliso Offshore Controlled Pelagic Linefish Zone North	Controlled	10:28:00	31.9	Deep	22.7	22	0.25	375.299
B08	2021-07-17	Central area (Area 2)	iSimangaliso Offshore Controlled Pelagic Linefish Zone North	Controlled	08:45:00	15	Shallow	21.6	21	1.2	105.63
B09	2021-07-17	Central area (Area 2)	iSimangaliso Offshore Controlled Pelagic Linefish Zone North	Controlled	08:50:00	23.2	Mid-depth	21.9	20.58	0.8	890.469
B10	2021-07-17	Central area (Area 2)	iSimangaliso Offshore Controlled Pelagic Linefish Zone North	Controlled	08:56:00	31.7	Deep	22.1	21	0.77	356.022
B11	2021-07-17	Central area (Area 2)	iSimangaliso Offshore Controlled Pelagic Linefish Zone North	Controlled	10:18:00	15.9	Shallow	22.2	21.21	0.45	915.805
B12	2021-07-17	Central area (Area 2)	iSimangaliso Offshore Controlled Pelagic Linefish Zone North	Controlled	10:35:00	24	Mid-depth	22.2	21.25	0.49	710.685
B13	2021-07-17	Central area (Area 2)	iSimangaliso Offshore Controlled Pelagic Linefish Zone North	Controlled	10:42:00	32.5	Deep	22.2	21.43	0.41	237.674
B14	2021-07-25	Central area (Area 2)	iSimangaliso Offshore Controlled Pelagic Linefish Zone North	Controlled	09:22:00	17	Shallow	21.3	21	1.04	745.503
B15	2021-07-25	Central area (Area 2)	iSimangaliso Offshore Controlled Pelagic Linefish Zone North	Controlled	09:29:00	25	Mid-depth	21.6	20.9	0.81	337.556
B16	2021-07-25	Central area (Area 2)	iSimangaliso Offshore Controlled Pelagic Linefish Zone North	Controlled	09:40:00	31.5	Deep	21.8	21	0.44	972.328
B17	2021-07-25	Central area (Area 2)	iSimangaliso Offshore Controlled Pelagic Linefish Zone North	Controlled	11:17:00	16.8	Shallow	22	21.42	0.71	706.599
B18	2021-07-25	Central area (Area 2)	iSimangaliso Offshore Controlled Pelagic Linefish Zone North	Controlled	11:10:00	21	Mid-depth	22	21.3	0.57	1052.14
B19	2021-07-25	Central area (Area 2)	iSimangaliso Offshore Controlled Pelagic Linefish Zone North	Controlled	11:03:00	28.2	Deep	22	21.34	0.27	503.931
B20	2021-07-31	Central area (Area 2)	iSimangaliso Offshore Controlled Pelagic Linefish Zone North	Controlled	08:46:00	16	Shallow	21.5	21	0.92	1219.46
B21	2021-08-14	Central area (Area 2)	iSimangaliso Offshore Controlled Pelagic Linefish Zone North	Controlled	10:23:00	27	Deep	22.5	21	0.68	299.639
B22	2021-07-31	Central area (Area 2)	iSimangaliso Offshore Controlled Pelagic Linefish Zone North	Controlled	08:52:00	16	Shallow	21.5	N/A	0.56	1001.62
B23	2021-09-13	Central area (Area 2)	iSimangaliso Offshore Controlled Pelagic Linefish Zone North	Controlled	09:41:00	25	Mid-depth	22.2	N/A	1.39	506.063
B24	2021-08-14	Central area (Area 2)	iSimangaliso Offshore Controlled Pelagic Linefish Zone North	Controlled	10:34:00	30	Deep	22.5	N/A	0.65	3063.39
B25	2021-07-31	Central area (Area 2)	iSimangaliso Offshore Controlled Pelagic Linefish Zone North	Controlled	08:56:00	14	Shallow	21.5	20.92	0.47	1074.7
B26	2021-09-13	Central area (Area 2)	iSimangaliso Offshore Controlled Pelagic Linefish Zone North	Controlled	09:49:00	17.8	Shallow	22.2	21.5	1.2	429.696
B27	2021-08-14	Central area (Area 2)	iSimangaliso Offshore Controlled Pelagic Linefish Zone North	Controlled	10:42:00	33	Deep	22.5	21	0.85	842.271
B28	2021-08-16	Central area (Area 2)	iSimangaliso Offshore Controlled Pelagic Linefish Zone North	Controlled	11:23:00	17	Shallow	22.6	21.5	1.28	899.319
B29	2021-07-31	Central area (Area 2)	iSimangaliso Offshore Controlled Pelagic Linefish Zone North	Controlled	10:18:00	14	Shallow	21.6	21	0.59	261.341
B30	2021-08-16	Central area (Area 2)	iSimangaliso Offshore Controlled Pelagic Linefish Zone North	Controlled	09:18:00	30	Deep	22.4	21.5	1.69	1085.33
B31	2021-07-31	Central area (Area 2)	iSimangaliso Offshore Controlled Pelagic Linefish Zone North	Controlled	10:31:00	14	Shallow	21.7	N/A	0.67	503.043
B32	2021-08-16	Central area (Area 2)	iSimangaliso Offshore Controlled Pelagic Linefish Zone North	Controlled	11:18:00	20	Shallow	22.6	N/A	1.82	192.563
B33	2021-08-16	Central area (Area 2)	iSimangaliso Offshore Controlled Pelagic Linefish Zone North	Controlled	09:26:00	27	Deep	22.5	N/A	1.87	751.396
B34	2021-07-31	Central area (Area 2)	iSimangaliso Offshore Controlled Pelagic Linefish Zone North	Controlled	10:23:00	14.6	Shallow	21.6	21.08	0.81	1319.28
B35	2021-08-16	Central area (Area 2)	iSimangaliso Offshore Controlled Pelagic Linefish Zone North	Controlled	09:40:00	30	Deep	22.6	21	2.25	474.003
B36	2021-08-16	Central area (Area 2)	iSimangaliso Offshore Controlled Pelagic Linefish Zone North	Controlled	11:05:00	23	Mid-depth	22.7	21.5	2.64	1555.14
B37	2021-09-13	Central area (Area 2)	iSimangaliso Offshore Controlled Pelagic Linefish Zone North	Controlled	11:15:00	13.7	Shallow	22.4	21	2.81	N/A
B38	2021-09-13	Central area (Area 2)	iSimangaliso Offshore Controlled Pelagic Linefish Zone North	Controlled	11:22:00	21	Mid-depth	22.4	N/A	2.71	158.585
B39	2021-09-13	Central area (Area 2)	iSimangaliso Offshore Controlled Pelagic Linefish Zone North	Controlled	11:32:00	27.3	Deep	22.3	20.5	3.6	1450.3
B40	2021-08-21	Central area (Area 2)	iSimangaliso Offshore Controlled Pelagic Linefish Zone North	Controlled	10:13:00	12.2	Shallow	22.2	21.5	N/A	129.787
B41	2021-08-21	Central area (Area 2)	iSimangaliso Offshore Controlled Pelagic Linefish Zone North	Controlled	10:29:00	28	Deep	22.5	21.5	N/A	136.676
B42	2021-08-21	Central area (Area 2)	iSimangaliso Offshore Controlled Pelagic Linefish Zone North	Controlled	08:55:00	18.7	Shallow	22.3	21.5	N/A	503.969
B43	2021-08-07	Central area (Area 2)	iSimangaliso Offshore Controlled Pelagic Linefish Zone North	Controlled	11:20:00	15.5	Shallow	21.7	21	1.84	630.607
B44	2021-08-07	Central area (Area 2)	iSimangaliso Offshore Controlled Pelagic Linefish Zone North	Controlled	11:34:00	24	Mid-depth	21.7	N/A	0.98	823.653
B45	2021-08-07	Central area (Area 2)	iSimangaliso Offshore Controlled Pelagic Linefish Zone North	Controlled	11:41:00	29.9	Deep	21.8	21	1.29	511.431
B46	2021-08-03	Central area (Area 2)	iSimangaliso Offshore Controlled Pelagic Linefish Zone North	Controlled	10:04:00	15.6	Shallow	21.6	21	0.68	955.962
B47	2021-08-03	Central area (Area 2)	iSimangaliso Offshore Controlled Pelagic Linefish Zone North	Controlled	10:13:00	25	Mid-depth	21.8	N/A	0.67	1234.54
B48	2021-08-03	Central area (Area 2)	iSimangaliso Offshore Controlled Pelagic Linefish Zone North	Controlled	10:23:00	31	Deep	21.9	21.71	0.63	1242.46

## Sheet: Species_MaxN_winter 2021
Site Number	Carcharhinus humani	Carcharhinus leucas	Carcharhinus limbatus	Galeocerdo cuvier	Himantura spp.	Maculabatis cf. ambigua	Pateobatis fai	Pateobatis jenkinsii	Rhynchobatus djiddensis	Sphyrna lewini
B01	0	0	0	0	0	0	0	0	0	0
B02	0	0	1	0	0	0	0	0	0	0
B03	0	0	0	0	0	0	0	0	1	0
B04	0	0	0	0	2	0	0	0	0	0
B05	0	0	0	0	0	0	0	0	0	0
B06	0	0	0	0	0	0	0	0	0	0
B07	1	0	0	0	0	0	0	0	0	0
B08	0	0	0	0	0	1	0	0	0	0
B09	0	0	0	0	0	0	0	0	0	0
B10	0	0	0	0	0	0	0	0	0	0
B11	0	0	0	0	0	0	0	1	0	0
B12	0	0	0	0	0	0	0	0	0	0
B13	1	0	0	0	0	0	0	0	1	0
B14	0	0	0	0	1	0	0	1	1	0
B15	0	0	0	0	1	0	0	0	1	0
B16	2	0	0	0	1	0	0	0	1	0
B17	0	0	0	0	0	0	0	0	0	0
B18	0	0	1	0	0	0	0	0	0	1
B19	0	0	0	0	0	0	0	0	0	0
B20	0	0	0	0	0	0	0	0	0	0
B21	0	0	0	0	0	0	0	0	1	0
B22	0	0	0	0	0	0	3	0	0	0
B23	0	0	0	0	2	0	0	1	0	1
B24	0	0	0	0	1	0	0	0	1	0
B25	0	0	0	0	1	0	0	1	0	0
B26	0	1	0	1	0	0	0	1	0	0
B27	0	0	0	0	0	0	0	1	1	0
B28	0	0	0	0	0	0	0	0	0	0
B29	0	0	0	0	0	0	0	0	0	0
B30	0	0	1	0	1	0	0	0	0	0
B31	0	0	0	0	2	0	0	0	0	0
B32	0	0	0	1	0	0	0	0	0	0
B33	0	0	0	0	0	0	0	0	1	0
B34	0	0	0	0	0	0	0	0	1	0
B35	0	0	0	0	1	0	0	1	0	0
B36	0	0	0	0	0	0	0	0	1	0
B37	0	0	0	1	0	0	0	0	0	0
B38	0	0	0	0	1	0	0	0	0	1
B39	0	0	0	0	2	0	0	0	1	0
B40	0	0	0	0	0	0	0	0	1	0
B41	0	0	0	0	0	0	0	0	1	0
B42	0	0	0	0	1	0	0	0	0	0
B43	0	0	1	0	3	0	0	0	0	0
B44	0	0	0	0	1	0	0	0	0	0
B45	0	0	0	0	0	0	0	0	2	0
B46	0	0	0	0	0	0	0	1	1	0
B47	0	0	0	0	1	0	0	0	0	0
B48	0	0	0	0	0	0	0	1	0	0

## Sheet: Deployment details_summer 2022
Site number	Date	Location	Management	Broad management	Time in (hour:min)	Depth (m)	Depth zone	SST (°C)	SBT (°C)	Current strength (km/h)	Underwater visibility (cm)
B01	2022-01-13	Central area (Area 2)	iSimangaliso Offshore Controlled Pelagic Linefish Zone North	Controlled	08:34:00	16	Shallow	27.4	N/A	N/A	687.445
B02	2022-01-13	Central area (Area 2)	iSimangaliso Offshore Controlled Pelagic Linefish Zone North	Controlled	08:46:00	22.4	Mid-depth	27.4	N/A	N/A	1103.16
B03	2022-01-13	Central area (Area 2)	iSimangaliso Offshore Controlled Pelagic Linefish Zone North	Controlled	08:53:00	31.4	Deep	27.5	26.25	N/A	527.53
B04	2022-01-13	Central area (Area 2)	iSimangaliso Offshore Controlled Pelagic Linefish Zone North	Controlled	10:33:00	16.2	Shallow	27.7	N/A	N/A	753.88
B05	2022-01-14	Central area (Area 2)	iSimangaliso Offshore Controlled Pelagic Linefish Zone North	Controlled	09:02:00	17.4	Shallow	27.7	N/A	N/A	281.673
B06	2022-01-14	Central area (Area 2)	iSimangaliso Offshore Controlled Pelagic Linefish Zone North	Controlled	09:20:00	23.5	Mid-depth	27.6	N/A	N/A	N/A
B07	2022-01-14	Central area (Area 2)	iSimangaliso Offshore Controlled Pelagic Linefish Zone North	Controlled	09:35:00	31.4	Deep	27.7	23.79	N/A	460.421
B08	2022-01-14	Central area (Area 2)	iSimangaliso Offshore Controlled Pelagic Linefish Zone North	Controlled	11:25:00	15	Shallow	27.8	N/A	N/A	489.934
B09	2022-01-14	Central area (Area 2)	iSimangaliso Offshore Controlled Pelagic Linefish Zone North	Controlled	11:30:00	22.5	Mid-depth	27.8	N/A	N/A	327.339
B10	2022-01-14	Central area (Area 2)	iSimangaliso Offshore Controlled Pelagic Linefish Zone North	Controlled	11:33:00	30	Deep	27.9	25.12	N/A	631.309
B11	2022-01-20	Central area (Area 2)	iSimangaliso Offshore Controlled Pelagic Linefish Zone North	Controlled	09:44:00	16	Shallow	28.5	N/A	0.7	994.11
B12	2022-01-20	Central area (Area 2)	iSimangaliso Offshore Controlled Pelagic Linefish Zone North	Controlled	09:56:00	23.2	Mid-depth	28.4	N/A	1.5	1404.48
B13	2022-01-20	Central area (Area 2)	iSimangaliso Offshore Controlled Pelagic Linefish Zone North	Controlled	10:08:00	30.5	Deep	28.4	26.08	1.7	596.216
B14	2022-01-26	Central area (Area 2)	iSimangaliso Offshore Controlled Pelagic Linefish Zone North	Controlled	07:57:00	15	Shallow	27.4	N/A	0.8	687.095
B15	2022-01-26	Central area (Area 2)	iSimangaliso Offshore Controlled Pelagic Linefish Zone North	Controlled	08:04:00	22	Mid-depth	27.5	N/A	1.1	779.06
B16	2022-01-26	Central area (Area 2)	iSimangaliso Offshore Controlled Pelagic Linefish Zone North	Controlled	08:22:00	31.8	Deep	27.5	25.17	1.1	616.527
B17	2022-01-26	Central area (Area 2)	iSimangaliso Offshore Controlled Pelagic Linefish Zone North	Controlled	09:56:00	16	Shallow	27.6	N/A	0.9	554.419
B18	2022-01-26	Central area (Area 2)	iSimangaliso Offshore Controlled Pelagic Linefish Zone North	Controlled	10:02:00	22.3	Mid-depth	27.6	N/A	0.8	641.029
B19	2022-01-26	Central area (Area 2)	iSimangaliso Offshore Controlled Pelagic Linefish Zone North	Controlled	10:08:00	29	Deep	27.7	24.36	0.8	890.203
B20	2022-02-12	Central area (Area 2)	iSimangaliso Offshore Controlled Pelagic Linefish Zone North	Controlled	07:44:00	15.5	Shallow	27.5	N/A	0.4	977.2
B21	2022-02-12	Central area (Area 2)	iSimangaliso Offshore Controlled Pelagic Linefish Zone North	Controlled	07:59:00	30	Deep	27.6	26.35	3.3	1472.62
B22	2022-02-19	Central area (Area 2)	iSimangaliso Offshore Controlled Pelagic Linefish Zone North	Controlled	07:33:00	16.3	Shallow	27.8	N/A	0.6	814.07
B23	2022-02-12	Central area (Area 2)	iSimangaliso Offshore Controlled Pelagic Linefish Zone North	Controlled	10:05:00	25	Mid-depth	28	N/A	0.7	811.266
B24	2022-03-04	Central area (Area 2)	iSimangaliso Offshore Controlled Pelagic Linefish Zone North	Controlled	08:12:00	29	Deep	25.8	N/A	0.6	277.616
B25	2022-02-19	Central area (Area 2)	iSimangaliso Offshore Controlled Pelagic Linefish Zone North	Controlled	07:41:00	14.4	Shallow	27.5	N/A	0.3	455.219
B26	2022-02-12	Central area (Area 2)	iSimangaliso Offshore Controlled Pelagic Linefish Zone North	Controlled	10:12:00	17	Shallow	28	N/A	0.7	1062.25
B27	2022-03-04	Central area (Area 2)	iSimangaliso Offshore Controlled Pelagic Linefish Zone North	Controlled	08:21:00	32	Deep	26	N/A	0.7	855.79
B28	2022-02-19	Central area (Area 2)	iSimangaliso Offshore Controlled Pelagic Linefish Zone North	Controlled	07:47:00	13.5	Shallow	27.5	26.4286	0.9	1192.03
B29	2022-02-12	Central area (Area 2)	iSimangaliso Offshore Controlled Pelagic Linefish Zone North	Controlled	10:17:00	17	Shallow	28	27.14	1.3	545.269
B30	2022-03-04	Central area (Area 2)	iSimangaliso Offshore Controlled Pelagic Linefish Zone North	Controlled	08:34:00	29.5	Deep	26	22.3036	0.9	1237.94
B31	2022-02-24	Central area (Area 2)	iSimangaliso Offshore Controlled Pelagic Linefish Zone North	Controlled	09:30:00	13.2	Shallow	27.9	27	0.8	550.115
B32	2022-02-24	Central area (Area 2)	iSimangaliso Offshore Controlled Pelagic Linefish Zone North	Controlled	09:24:00	19	Shallow	27.9	N/A	1.9	409.686
B33	2022-02-24	Central area (Area 2)	iSimangaliso Offshore Controlled Pelagic Linefish Zone North	Controlled	09:13:00	27.2	Deep	27.8	N/A	2.2	930.661
B34	2022-02-24	Central area (Area 2)	iSimangaliso Offshore Controlled Pelagic Linefish Zone North	Controlled	11:04:00	13.5	Shallow	27.9	N/A	1.9	276.539
B35	2022-02-24	Central area (Area 2)	iSimangaliso Offshore Controlled Pelagic Linefish Zone North	Controlled	11:22:00	29.5	Deep	28	25.2857	2.4	253.868
B36	2022-02-24	Central area (Area 2)	iSimangaliso Offshore Controlled Pelagic Linefish Zone North	Controlled	11:13:00	22.8	Mid-depth	28	N/A	2.2	626.546
B37	2022-03-04	Central area (Area 2)	iSimangaliso Offshore Controlled Pelagic Linefish Zone North	Controlled	10:12:00	14	Shallow	26	N/A	1.5	230.729
B38	2022-03-04	Central area (Area 2)	iSimangaliso Offshore Controlled Pelagic Linefish Zone North	Controlled	10:20:00	20.4	Mid-depth	26.1	N/A	2	755.006
B39	2022-03-04	Central area (Area 2)	iSimangaliso Offshore Controlled Pelagic Linefish Zone North	Controlled	10:30:00	27.7	Deep	26	23.7679	3.3	790.449
B40	2022-03-12	Central area (Area 2)	iSimangaliso Offshore Controlled Pelagic Linefish Zone North	Controlled	08:44:00	12.7	Shallow	27.6	N/A	0.9	N/A
B41	2022-03-12	Central area (Area 2)	iSimangaliso Offshore Controlled Pelagic Linefish Zone North	Controlled	09:06:00	28.6	Deep	27.8	25.1607	1.8	639.64
B42	2022-03-12	Central area (Area 2)	iSimangaliso Offshore Controlled Pelagic Linefish Zone North	Controlled	10:44:00	15.6	Shallow	28.7	N/A	1.1	325.215
B43	2022-03-20	Central area (Area 2)	iSimangaliso Offshore Controlled Pelagic Linefish Zone North	Controlled	09:09:00	16	Shallow	26.7	26.6964	0.6	311.906
B44	2022-03-20	Central area (Area 2)	iSimangaliso Offshore Controlled Pelagic Linefish Zone North	Controlled	09:19:00	24.7	Mid-depth	26.7	N/A	0.5	1399.75
B45	2022-03-20	Central area (Area 2)	iSimangaliso Offshore Controlled Pelagic Linefish Zone North	Controlled	09:26:00	29.7	Deep	26.8	N/A	0.9	614.643
B46	2022-03-20	Central area (Area 2)	iSimangaliso Offshore Controlled Pelagic Linefish Zone North	Controlled	10:54:00	14.8	Shallow	27	27.125	0.9	508.146
B47	2022-03-20	Central area (Area 2)	iSimangaliso Offshore Controlled Pelagic Linefish Zone North	Controlled	11:00:00	23	Mid-depth	27	N/A	1.1	272.795
B48	2022-03-20	Central area (Area 2)	iSimangaliso Offshore Controlled Pelagic Linefish Zone North	Controlled	11:06:00	31.2	Deep	27	25.3571	1	441.609

## Sheet: Species_MaxN_summer 2022
Site Number	Carcharhinus humani	Carcharhinus leucas	Galeocerdo cuvier	Himantura spp.	Loxodon macrorhinus	Maculabatis cf. ambigua	Pateobatis fai	Pateobatis jenkinsii	Rhynchobatus djiddensis
B01	0	0	0	0	0	0	0	0	0
B02	1	0	0	1	0	0	0	0	1
B03	2	0	0	0	0	0	0	0	0
B04	0	0	0	0	0	0	0	0	0
B05	0	0	0	1	0	0	0	0	0
B06	2	0	0	1	0	0	0	0	0
B07	1	0	1	0	0	0	0	0	0
B08	0	0	0	2	0	0	0	0	0
B09	0	0	0	0	1	0	0	0	0
B10	3	0	0	0	1	0	0	0	0
B11	0	0	1	1	0	0	1	0	0
B12	0	0	0	0	0	0	1	0	0
B13	0	0	0	0	0	0	0	0	0
B14	0	0	0	0	0	0	0	1	0
B15	0	0	0	1	0	1	0	0	0
B16	1	0	0	2	0	0	0	0	0
B17	0	0	0	0	0	0	0	0	0
B18	0	0	0	0	0	0	1	0	0
B19	0	0	0	4	0	0	0	0	0
B20	0	0	0	0	0	0	0	0	0
B21	0	1	0	0	0	0	0	0	0
B22	0	0	0	2	0	0	0	0	0
B23	0	0	0	0	0	0	0	0	0
B24	1	1	0	0	0	0	0	0	0
B25	0	0	0	1	0	0	0	0	0
B26	0	0	0	0	0	0	0	0	0
B27	0	0	0	0	0	0	0	0	0
B28	0	0	0	2	0	0	0	1	0
B29	0	0	0	2	0	0	0	0	0
B30	0	1	0	0	0	0	0	0	0
B31	0	0	0	0	0	0	0	0	0
B32	0	0	0	0	0	0	0	1	0
B33	0	0	0	0	0	0	0	0	0
B34	0	0	0	0	0	1	0	0	0
B35	0	0	0	0	0	0	0	0	1
B36	0	0	0	0	0	0	0	0	0
B37	1	0	0	1	0	0	0	0	1
B38	0	0	0	0	0	0	0	0	0
B39	0	0	0	0	0	0	0	0	0
B40	0	0	0	0	0	0	0	0	0
B41	0	0	0	1	0	0	0	0	1
B42	0	0	0	0	0	0	0	0	0
B43	0	0	0	0	0	0	0	0	0
B44	0	0	0	0	0	0	0	0	1
B45	0	0	0	0	0	0	0	0	1
B46	0	0	0	0	0	0	2	0	0
B47	1	0	0	0	0	0	0	0	0
B48	0	0	0	0	0	0	0	0	1
